# Supplementary material for: Fungal bioactive macrolides
Source: Royal Society of Chemistry journal article supplement (doi:10.1039/d2np00025c), 2022-01-01
Supplement: d2np00025c1.pdf [file d2np00025c1.pdf]

## Fungal Bioactive Macrolides

Antonio Evidente\*

Department of Chemical Science, University of Naples Federico II, Complesso Universitario Monte S. Angelo, Via  
Cintia 4, 80126, Naples, Italy

### Supplementary Information

Xestodecalactone A-C (Fig. S1) were isolated from *Penicillium cf. montanense*. The total synthesis of (+)-xestodecalactone A was realized by a key reaction using a convergent Pd-catalyzed  $\alpha$ - arylation between boronic acid and an  $\alpha$ -bromoester. This synthesis also allowed to assign its absolute configuration.<sup>2</sup> Sporostatin, was isolated from *Sporomiella* sp. M50322.<sup>3</sup> Its first total high stereoselectivity synthesis of sporostatin was realized and the *S* absolute configuration was determined.<sup>4</sup>

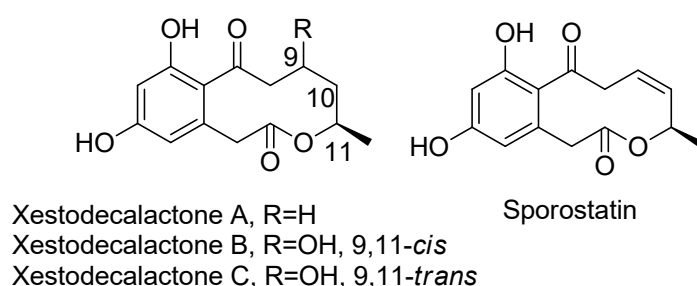

**Fig. S1.** Structures of Xestodecalactones A-C and sporostatin, isolated, respectively from *Penicillium cf. montanense* and *Sporomiella* sp. M5032

Xestodecalactones D-F (Fig. S2) were isolated together with four known compounds *Corynespora cassiicola*. The latter compounds were identified as as corynesidone A and B, 2,5,7-trihydroxy-3-methoxynaphthalene-1,4-dione and 6-(3-hydroxybutyl)-7-O-methylspinochrome B.<sup>5</sup>

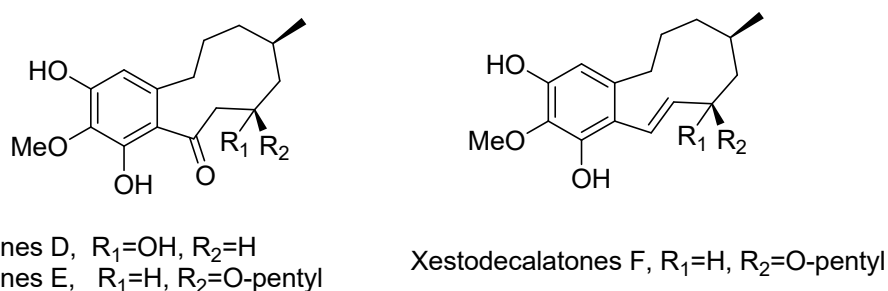

**Fig. S2.** Xestodecalatones D-F isolated from *Corynespora cassiicola*

**Table S1** Fungal Bioactive close to macrolides

| Number of macrolide ring members | Compounds           | Fungal Producer                   | Activities                       | Refs. |
|----------------------------------|---------------------|-----------------------------------|----------------------------------|-------|
| 10                               | Xestodecalactone A  | <i>Penicillium cf. montanense</i> | No toxic                         | 1     |
| "                                | Xestodecalactone B  | "                                 | Antifungal activity              | "     |
| "                                | Xestodecalactone C  | "                                 | No toxic                         | "     |
| "                                | Sporostatin         | <i>Spomoriella</i> sp. M5032      | Inhibitor of EGF receptor kinase | 2     |
| "                                | Xestodecalactones D | <i>Corynespora cassiicola</i>     | No activity                      | 5     |
| "                                | Xestodecalactones E | "                                 | "                                | "     |
| "                                | Xestodecalactones F | "                                 | "                                | "     |

## References

1. R. A. Edrada, M. Heubes, G. Brauers, V. Wray, A. Berg, U. Gräfe, M. Wohlfarth, J. Muhlbacher, K. Schaumann, Sudarsono, G. Bringmann and P. Proksch, *J. Nat. Prod.*, 2002, 65, 1598-1604.
2. D. De Joarder and M. P. Jennings, *Tetrahedron Lett.*, 2013, 54, 3990-3992.
3. Y. Murakami, A. Ishii, S. Mizuno, S. Yaginuma and U. Yoshimasa. *Anticancer Res.*, 1999, 19, 4145-4149.
4. J. S. Yadav, N. Thrimurtulu, K. U. Gayathri, B. S. Reddy and A. R. Prasad. *Synlett.* 2009, 790-792.
5. W. Ebrahim, A. H. Aly, A. Mándi, F. Totzke, M. H. Kubbutat, M. V. Wray, W.-H. Lin, H. Dai, P. Proksch, T. Kurtán and A. Debbab, *Eur. J. Org. Chem.*, 2012, 3476-3484.
